# Supplementary material for: National administrative record linkage between specialist community drug and alcohol treatment data (the National Drug Treatment Monitoring System (NDTMS)) and inpatient hospitalisation data (Hospital Episode Statistics (HES)) in England: design, method and evaluation
Source: HighWire-hosted journal article supplement (doi:10.1136/bmjopen-2020-043540), 2020-11-01
Supplement: bmjopen-2020-043540supp001_data_supplement.pdf [file bmjopen-2020-043540supp001_data_supplement.pdf]

## Online Supplementary Material

### Contents

### Tables

S1: Differences between full NDTMS cohort and the 'gold-standard' NDTMS cohort with NHS number available

S2: The odds of an average  $\geq 5$  day length of hospital admission within the 'gold-standard' NDTMS cohort with NHS number available, in the 'unbiased' sample matched using NHS number and the 'biased' sample matched using the four-stage algorithm, following application of inverse probability weighting to correct for potential linkage bias

S3: Differences between NDTMS cohort that contains sufficient matching data (i.e. a validly coded dob, sex and postcode) and the NDTMS cohort that does not contain sufficient matching data

S4: Description of variables available for linkage

### References

## Tables

Table S1: Differences between full NDTMS cohort and the 'gold-standard' NDTMS cohort with NHS number available

|                              |                                                           | Full NDTMS Cohort n (%) | Cohort with NHS number n (%) | p value |
|------------------------------|-----------------------------------------------------------|-------------------------|------------------------------|---------|
| <b>All</b>                   |                                                           | 268,251 (100.0)         | 1,328 (100.0)                |         |
| <b>Sociodemographic</b>      | <b>Sex</b>                                                |                         |                              |         |
|                              | Female                                                    | 83,015 (31.0)           | 393 (29.6)                   | 0.29    |
|                              | Male                                                      | 185,236 (69.0)          | 935 (70.4)                   |         |
|                              | <b>Age in years (at presentation to D&amp;A services)</b> |                         |                              |         |
|                              | 18-30                                                     | 36,068 (13.4)           | 143 (10.8)                   | 0.04*   |
|                              | 31-45                                                     | 127,635 (47.6)          | 720 (54.2)                   |         |
|                              | 46-60                                                     | 89,643 (33.4)           | 438 (33.0)                   |         |
|                              | 60+                                                       | 14,905 (5.6)            | 27 (2.0)                     |         |
|                              | <b>Deprivation (IMD) Quintile</b>                         |                         |                              |         |
|                              | First (Most deprived)                                     | 81,478 (33.2)           | 472 (39.9)                   | <0.001* |
|                              | Second                                                    | 68,808 (28.0)           | 366 (29.4)                   |         |
|                              | Third                                                     | 47,139 (19.2)           | 271 (21.8)                   |         |
|                              | Fourth                                                    | 33,354 (13.6)           | 111 (8.9)                    |         |
|                              | Fifth (Least deprived)                                    | 15,002 (6.1)            | 25 (2.0)                     |         |
|                              | <b>Residential Status</b>                                 |                         |                              |         |
| Non NFA postcode             | 255,515 (95.3)                                            | 1,286 (96.8)            | 0.01*                        |         |
| NFA postcode                 | 12,736 (4.7)                                              | 42 (3.2)                |                              |         |
| <b>Ethnicity<sup>1</sup></b> |                                                           |                         |                              |         |
| White                        | 230,012 (90.6)                                            | 1,064 (87.5)            | <0.001*                      |         |
| Non-white                    | 23,928 (9.4)                                              | 152 (12.5)              |                              |         |
| <b>Clinical</b>              | <b>Substance Misuse<sup>2</sup></b>                       |                         |                              |         |
|                              | Opioid                                                    | 139,845 (52.1)          | 775 (58.4)                   | <0.001* |
|                              | Alcohol only                                              | 75,555 (28.2)           | 362 (27.3)                   |         |
|                              | Non-opioid and alcohol                                    | 28,598 (10.7)           | 95 (7.1)                     |         |
|                              | Non-opioid only                                           | 24,253 (9.0)            | 96 (7.2)                     |         |

\* p<0.05; 1 Office of Population Censuses and Surveys (OPCS) categories A, B and C collapsed as white, all other OPCS categories (D-S) collapsed as non-white

2 NDTMS categorisation **opioid**: clients with any mention of opioid use in any treatment episode during the year irrespective of other substances cited; **alcohol only**: clients who present with problems related to alcohol but no other substances; **non-opioid and alcohol**: clients with non-opioid drug *and* alcohol use problems (but *not* opioids) recorded in any treatment episode during the year; **non-opioid only**: clients who present for treatment related to non-opioid drug use but *not* opioids or alcohol

Table S2: The conditional odds of an average  $\geq 5$  day length of hospital admission within the 'gold-standard' NDTMS cohort with NHS number available, in the 'unbiased' sample matched using NHS number and the 'biased' sample matched using the four-stage algorithm, following application of inverse probability weighting to correct for potential linkage bias

|  |                                                           | 'Unbiased' sample matched using NHS number |                  | 'Biased' sample matched using four-stage algorithm |                  |                                  |
|--|-----------------------------------------------------------|--------------------------------------------|------------------|----------------------------------------------------|------------------|----------------------------------|
|  |                                                           | n (%)                                      | OR (95%CI)       | n (%)                                              | OR (95%CI)       | Weighted OR <sup>1</sup> (95%CI) |
|  | <b>All</b>                                                | 1,153 (100.0)                              | -                | 1,053 (100.0)                                      | -                | -                                |
|  | <b>Sex</b>                                                |                                            |                  |                                                    |                  |                                  |
|  | Female                                                    | 370 (32.1)                                 | Reference        | 336 (31.9)                                         | Reference        | Reference                        |
|  | Male                                                      | 783 (67.9)                                 | 1.27 (0.80-2.02) | 717 (68.1)                                         | 1.33 (0.85-2.09) | 1.26 (0.80-2.00)                 |
|  | <b>Age in years (at presentation to D&amp;A services)</b> |                                            |                  |                                                    |                  |                                  |
|  | $\leq 45$                                                 | 747 (64.8)                                 | Reference        | 658 (62.5)                                         | Reference        | Reference                        |
|  | $> 45$                                                    | 406 (35.2)                                 | 1.07 (0.69-1.65) | 395 (37.5)                                         | 1.17 (0.78-1.77) | 1.11 (0.71-1.73)                 |
|  | <b>Deprivation (IMD) Quintile</b>                         |                                            |                  |                                                    |                  |                                  |
|  | First (Most deprived)                                     | 402 (37.4)                                 | Reference        | 363 (35.7)                                         | Reference        | Reference                        |
|  | All other quintiles                                       | 674 (62.6)                                 | 0.64 (0.42-1.00) | 655 (64.3)                                         | 0.71 (0.47-1.08) | 0.70 (0.40-1.10)                 |
|  | <b>Residential Status</b>                                 |                                            |                  |                                                    |                  |                                  |
|  | Non NFA postcode                                          | 1,115 (96.7)                               | Reference        | 1,011 (96.0)                                       | Reference        | Reference                        |
|  | NFA postcode                                              | 38 (3.3)                                   | 0.59 (0.13-2.51) | 42 (4.0)                                           | 0.56 (0.13-2.35) | 0.60 (0.12-2.49)                 |
|  | <b>Ethnicity<sup>2</sup></b>                              |                                            |                  |                                                    |                  |                                  |
|  | White                                                     | 945 (89.7)                                 | Reference        | 915 (90.0)                                         | Reference        | Reference                        |
|  | Non-white                                                 | 109 (10.3)                                 | 1.74 (0.90-3.36) | 102 (10.0)                                         | 2.19 (1.25-3.84) | 1.89 (0.99-3.39)                 |
|  | <b>Substance Misuse<sup>3</sup></b>                       |                                            |                  |                                                    |                  |                                  |
|  | Opioid                                                    | 651 (56.5)                                 | Reference        | 569 (54.0)                                         | Reference        | Reference                        |
|  | All other drug categories                                 | 502 (43.5)                                 | 0.67 (0.43-1.04) | 484 (46.0)                                         | 0.65 (0.43-0.99) | 0.65 (0.42-1.00)                 |

OR Odds Ratio; CI Confidence Interval; IMD Index of Multiple Deprivation

<sup>1</sup> Model with inverse probability weighting for matching included; <sup>2</sup> Office of Population Censuses and Surveys (OPCS) categories A, B and C collapsed as white, all other OPCS categories (D-S) collapsed as non-white; <sup>3</sup> NDTMS categorisation **opioid**: clients with any mention of opioid use in any treatment episode during the year irrespective of other substances cited; **alcohol only**: clients who present with problems related to alcohol but no other substances; **non-opioid and alcohol**: clients with non-opioid drug *and* alcohol use problems (but *not* opioids) recorded in any treatment episode during the year; **non-opioid only**: clients who present for treatment related to non-opioid drug use but *not* opioids or alcohol

Table S3: Differences between NDTMS cohort that contains sufficient matching data (i.e. a validly coded dob, sex and postcode) and the NDTMS cohort that does not contain sufficient matching data

|                              |                                                           | NDTMS cohort that does contain sufficient matching data<br>n (%) | NDTMS cohort that does not contain sufficient matching data<br>n (%) | OR (95%CI)       | aOR (95%CI) <sup>1</sup> |
|------------------------------|-----------------------------------------------------------|------------------------------------------------------------------|----------------------------------------------------------------------|------------------|--------------------------|
| <b>All</b>                   |                                                           | 258,240 (100.0)                                                  | 10,011 (100.0)                                                       | -                |                          |
| <b>Sociodemographic</b>      | <b>Sex</b>                                                |                                                                  |                                                                      |                  |                          |
|                              | Female                                                    | 80,111 (31.0)                                                    | 2,904 (29.0)                                                         | Reference        | Reference                |
|                              | Male                                                      | 178,129 (69.0)                                                   | 7,107 (71.0)                                                         | 1.10 (1.05-1.15) | 1.27 (1.15-1.40)         |
|                              | <b>Age in years (at presentation to D&amp;A services)</b> |                                                                  |                                                                      |                  |                          |
|                              | 18-30                                                     | 35,446 (13.7)                                                    | 622 (6.2)                                                            | Reference        | Reference                |
|                              | 31-45                                                     | 122,999 (47.6)                                                   | 4,636 (56.3)                                                         | 2.15 (1.97-2.34) | 0.94 (0.83-1.06)         |
|                              | 46-60                                                     | 85,425 (33.1)                                                    | 4,218 (42.1)                                                         | 2.81 (2.58-3.06) | 0.61 (0.53-0.71)         |
|                              | 60+                                                       | 14,370 (5.6)                                                     | 535 (5.3)                                                            | 2.12 (1.89-2.39) | 0.52 (0.40-0.67)         |
|                              | <b>Deprivation (IMD) Quintile<sup>2</sup></b>             |                                                                  |                                                                      |                  |                          |
|                              | First (Most deprived)                                     | 81,478 (33.2)                                                    | -                                                                    | -                | -                        |
|                              | Second                                                    | 68,808 (28.0)                                                    | -                                                                    | -                | -                        |
|                              | Third                                                     | 47,139 (19.2)                                                    | -                                                                    | -                | -                        |
|                              | Fourth                                                    | 33,354 (13.6)                                                    | -                                                                    | -                | -                        |
|                              | Fifth (Least deprived)                                    | 15,002 (6.1)                                                     | -                                                                    | -                | -                        |
|                              | <b>Residential Status<sup>2</sup></b>                     |                                                                  |                                                                      |                  |                          |
|                              | Non NFA postcode                                          | 245,504 (95.1)                                                   | -                                                                    | -                | -                        |
| NFA postcode                 | 12,736 (4.9)                                              | -                                                                | -                                                                    | -                |                          |
| <b>Ethnicity<sup>3</sup></b> |                                                           |                                                                  |                                                                      |                  |                          |
| White                        | 228,023 (90.6)                                            | 1,989 (89.2)                                                     | Reference                                                            | Reference        |                          |
| Non-white                    | 23,688 (9.4)                                              | 240 (10.8)                                                       | 1.16 (1.02-1.33)                                                     | 0.84 (0.73-0.97) |                          |
| <b>Clinical</b>              | <b>Substance Misuse<sup>4</sup></b>                       |                                                                  |                                                                      |                  |                          |
|                              | Opioid                                                    | 131,316 (50.9)                                                   | 8,529 (85.2)                                                         | Reference        | Reference                |
|                              | Alcohol only                                              | 74,840 (29.0)                                                    | 715 (7.1)                                                            | 0.15 (0.14-0.16) | 0.86 (0.77-0.95)         |
|                              | Non-opioid and alcohol                                    | 28,202 (10.9)                                                    | 396 (4.0)                                                            | 0.22 (0.20-0.24) | 1.07 (0.93-1.22)         |
|                              | Non-opioid only                                           | 23,882 (9.3)                                                     | 371 (3.7)                                                            | 0.24 (0.22-0.27) | 1.05 (0.91-1.22)         |

<sup>1</sup> Adjusted for all other covariates listed in table 2. <sup>2</sup> All records that did not contain sufficient matching data lacked validly coded postcodes, as such no IMD quintile or residential status values were available for this cohort. <sup>3</sup> Office of Population Censuses and Surveys (OPCS) categories A, B and C collapsed as white, all other OPCS categories (D-S) collapsed as non-white. <sup>4</sup> NDTMS categorisation: **opioid**: clients with any mention of opioid use in any treatment episode during the year irrespective of other substances cited; **alcohol only**: clients who present with problems related to alcohol but no other substances; **non-opioid and alcohol**: clients with non-opioid drug and alcohol use problems (but not opioids) recorded in any treatment episode during the year; **non-opioid only**: clients who present for treatment related to non-opioid drug use but not opioids or alcohol

Table S4: Description of variables available for linkage

| <b>Variable</b>                           | <b>Format</b>          | <b>Notes</b>                                                                                                                                                      |
|-------------------------------------------|------------------------|-------------------------------------------------------------------------------------------------------------------------------------------------------------------|
| Date of Birth ( <i>dob</i> )              | 'yyyymmdd'             |                                                                                                                                                                   |
| Sex ( <i>sex</i> )                        | 1=male; 2=female       |                                                                                                                                                                   |
| Sector Level Postcode ( <i>postcode</i> ) | e.g. 'S752' or 'NE177' | This contains the entire 'outcode' and the first character of the 'incode', each unique sector level postcode representing roughly 3000 households in England (1) |
| Ethnicity ( <i>ethnicity</i> )            | e.g. 'A'               | 16 categories A - S harmonised to current Office of Population Censuses and Surveys (OPCS) definitions (2, 3)                                                     |
| GP Practice Code ( <i>gppractice</i> )    | e.g. 'C87034'          | A unique six character code ascribed to each GP practice in England (3, 4)                                                                                        |

## References

1. <https://www.mrs.org.uk/pdf/postcodeformat.pdf>.
2. Harmonised country specific ethnic group question(s) and dissemination of output(s) for use in social surveys and administrative data in England, Northern Ireland, Scotland and Wales <https://gss.civilservice.gov.uk/policy-store/ethnicity/#great-britain>.
3. Hospital Episode Statistics Data Dictionary <https://digital.nhs.uk/data-and-information/data-tools-and-services/data-services/hospital-episode-statistics/hospital-episode-statistics-data-dictionary>.
4. GP and GP practice related data <https://digital.nhs.uk/services/organisation-data-service/data-downloads/gp-and-gp-practice-related-data>.
